# Supplementary material for: Scalable and continuous fabrication of bio-inspired dry adhesives with a thermosetting polymer
Source: Royal Society of Chemistry journal article supplement (doi:10.1039/c7sm02354e), 2018-01-01
Supplement: c7sm02354e1.pdf [file c7sm02354e1.pdf]

# Scalable and continuous fabrication of bioinspired dry adhesives with a thermosetting polymer

*Sung Ho Lee<sup>a</sup>, Sung Woo Kim<sup>a</sup>, Bong Su Kang<sup>a</sup>, Pahn-Shick Chang<sup>b,c</sup> and Moon Kyu Kwak<sup>\*,a</sup>*

<sup>a</sup> School of Mechanical Engineering, Kyungpook National University, Daegu, 41566, Korea

<sup>b</sup> Department of Agricultural Biotechnology, Seoul National University, Seoul 08826, Korea

<sup>c</sup> Research Institute of Agriculture and Life Sciences, Seoul National University, Seoul 08826, Korea

**KEYWORDS:** Continuous production, PDMS, Roll type equipment, Dry adhesive, Biomimetics.

**Supporting Information.**

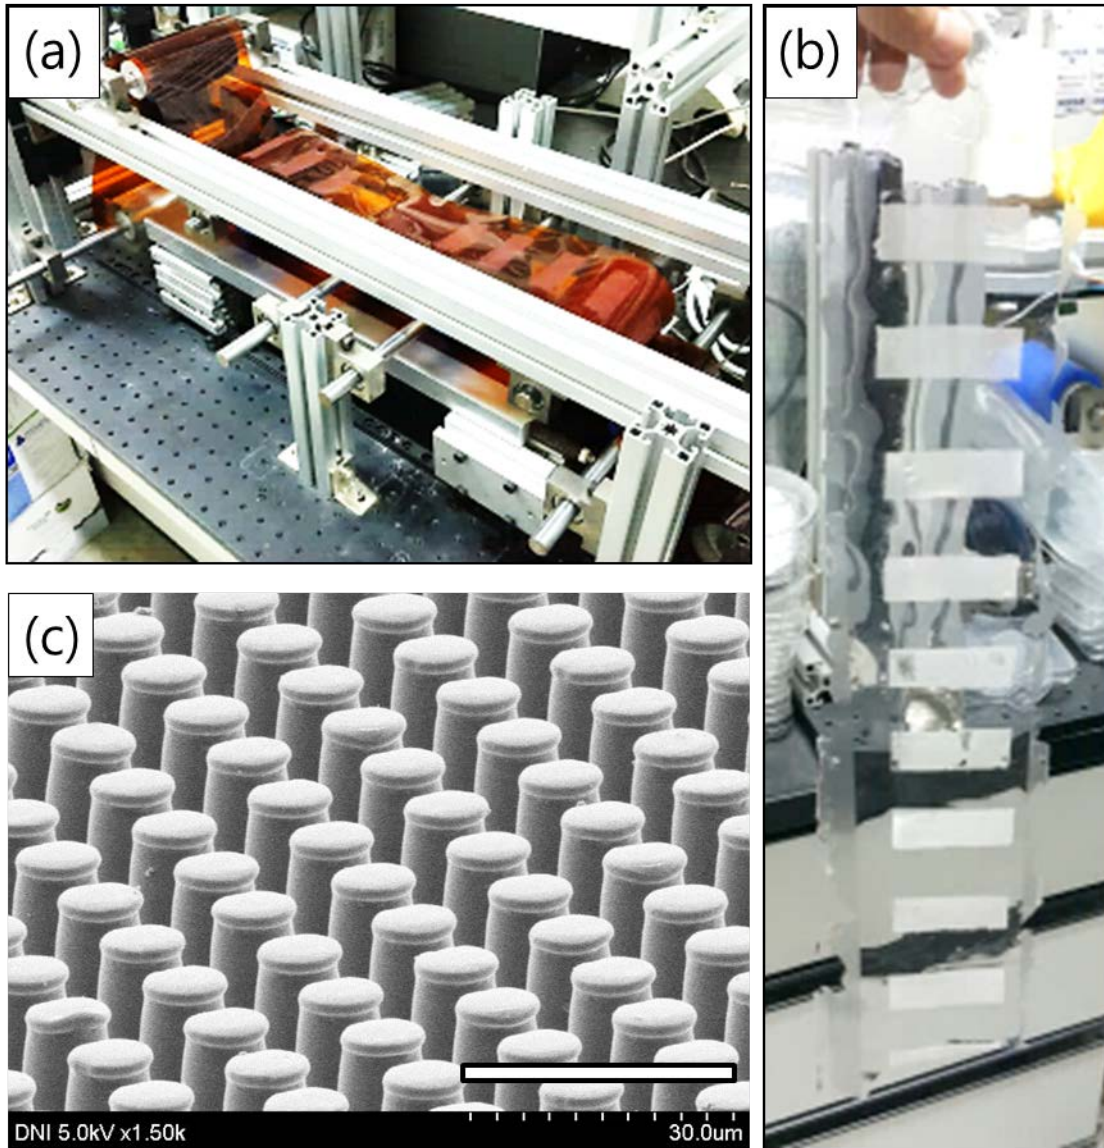

**Figure S1.** (a) Photograph of TRL equipment. (b) Photography of the dry adhesive fabricated by TRL equipment (c) SEM image of the dry adhesive. Scale bar is 30  $\mu\text{m}$ .

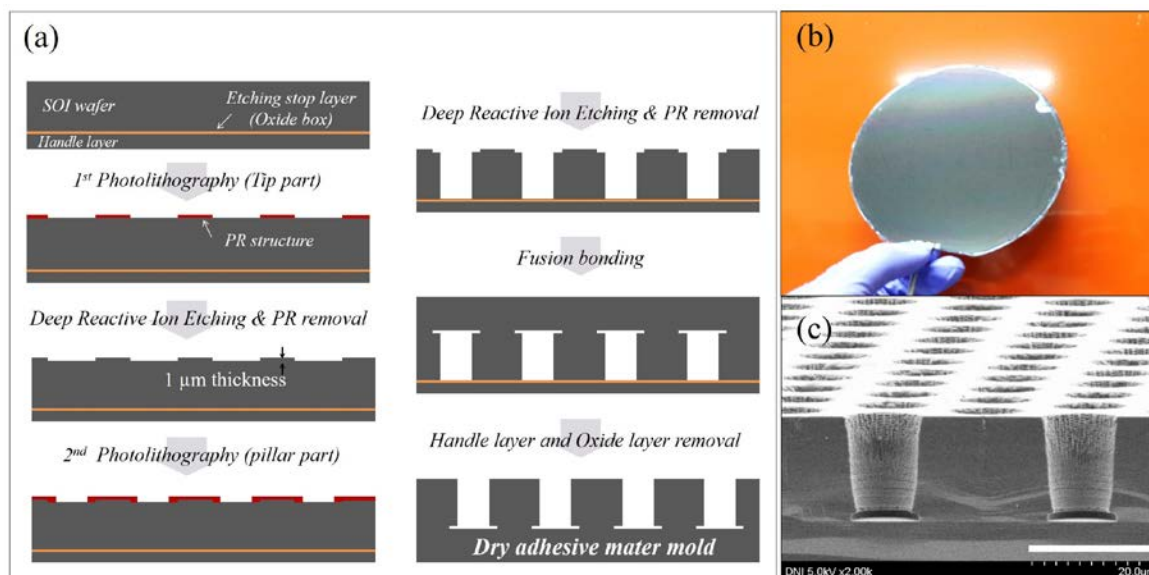

**Figure S2.** (a) Schematic image of the fabrication process for dry adhesive mold inspired by Gecko-foot. (b)(c) Photograph and SEM image of the dry adhesive master mold. Scale bar is 20 μm.

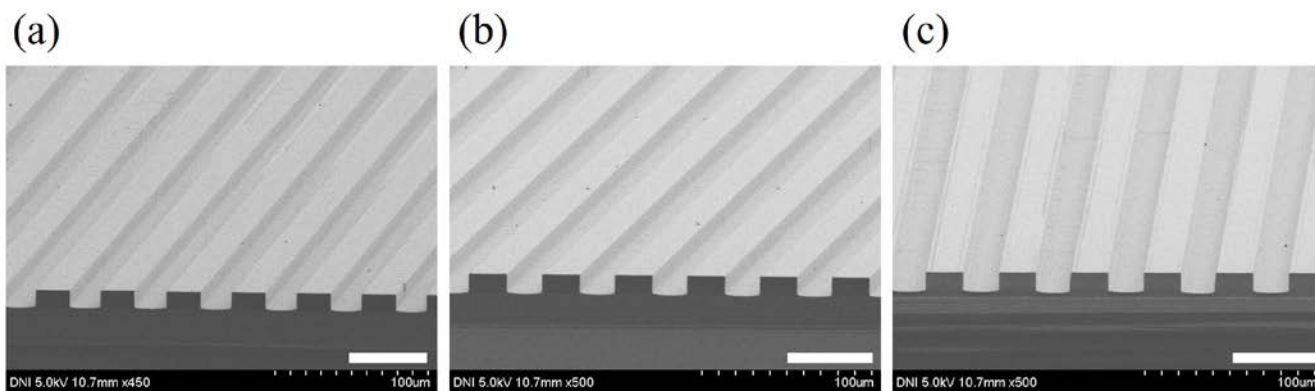

**Figure S3.** Result of the PUA baking experiment (a) control (b) 1-hour baking at 100 °C (c) 1-hour baking at 150 °C. Scale bars are 50  $\mu\text{m}$ .

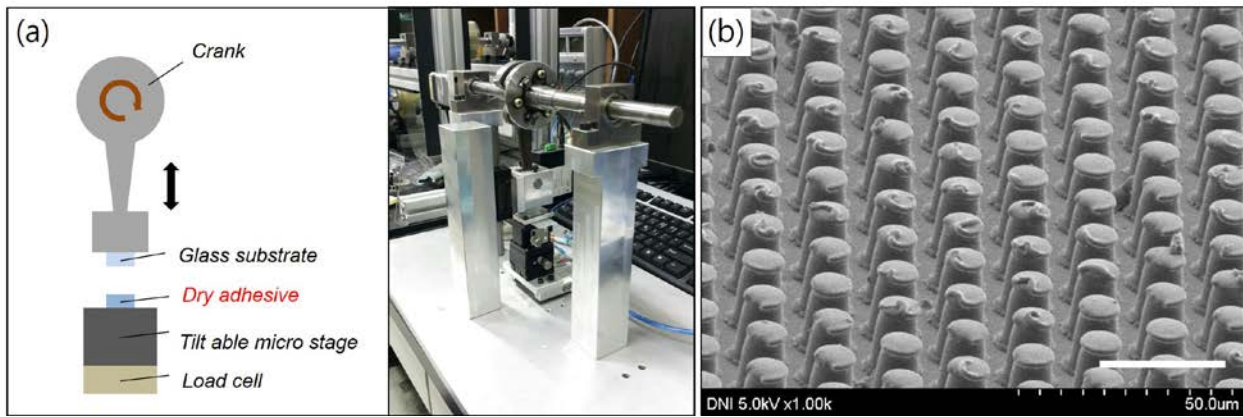

**Figure S4.** (a) Schematic illustration and photograph of custom-built measurement equipment. (b) SEM image of dry adhesive after durability test. Scale bar is 30  $\mu\text{m}$

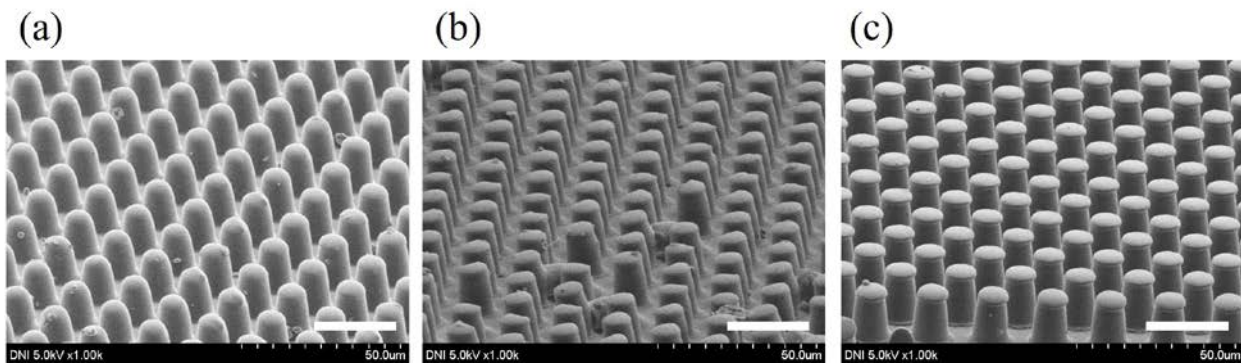

**Figure S5.** SEM images with respect to PDMS filling time in 500  $\mu\text{m}$  thickness PDMS (a) 50s (b) 100s (c) 150s. Scale bar is 30  $\mu\text{m}$

(a)

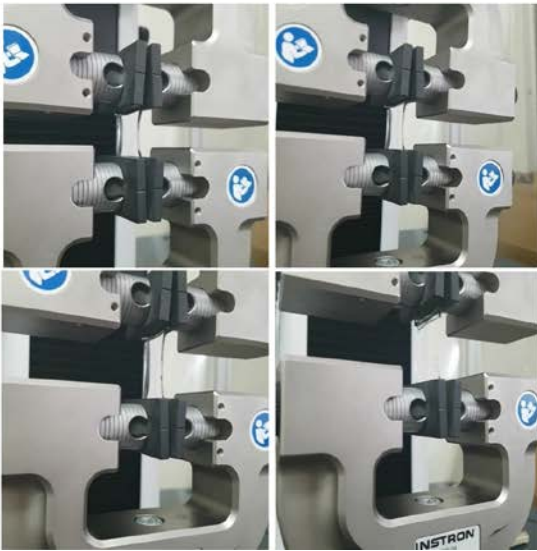

(b)

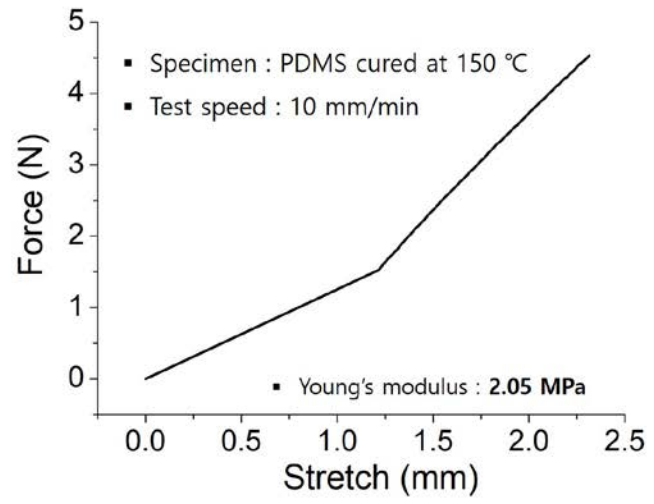

**Figure S6.** (a) Time lapse images of tensile test. (b) Result of tensile test.
